# Supplementary material for: An integrative decision-making framework to guide policies on regulating ChatGPT usage
Source: PeerJ Comput Sci. 2024 Feb 29;10:e1845. doi: 10.7717/peerj-cs.1845 (PMC10911759; doi:10.7717/peerj-cs.1845)
Supplement: Supplemental Information 1 — The extracted data obtained from the articles reviewed as well as the critical analysis of the data based on themes of the policy making framework proposed in this study, [file peerj-cs-10-1845-s001.xlsx]

## Sheet: 41-Extracted papers for analysi
Authors	Title	Year	Risk/Ethical issues (vulnerability and expossure)	Reward (Opportunity, capability, access)	Resilience (Absorb, adapt, transform)	Research area	Author Keywords
Dowling M.; Lucey B.	ChatGPT for (Finance) research: The Bananarama Conjecture	2023	weaker on literature synthesis, developing appropriate testing frameworks, quality of output	assist with finance research, idea generation, data identification	Private data input, researcher domain expertise input	Finance	Artificial intelligence; ChatGPT; Ethics; Finance research
Eggmann F.; Weiger R.; Zitzmann N.U.; Blatz M.B.	Implications of large language models such as ChatGPT for dental medicine	2023	occasionally giving incorrect answers, producing nonsensical content, and presenting misinformation as fact., safeguard against inaccurate, outdated, and biased responses,patient data confidentiality and cybersecurity	clinical decision support, text summarization, efficient writing, and multilingual communication., writing fluency,	administrative personnel and the provision of dental telemedicine, but acceptable usage boundaries in science need to be established.	Dental medicine	artificial intelligence; dental care; dental education; evidence-based dentistry; machine learning
Perkins M.	Academic Integrity considerations of AI Large Language Models in the post-pandemic era: ChatGPT and beyond		academic integrity concern, plagiarism, creating original, coherent text that can avoid detection by existing technological methods of detection and trained academic staff alike, create original written content that students may use in their assessments	commercial usage as a means of ‘assisting’ students with assessments, easy access	teaching of writing and composition, the possibilities of co-creation between humans and AI, supporting EFL learners, and improving Automated Writing Evaluations (AWE), academic integrity policies of any given HEI,	Education
Lund B.D.; Wang T.; Mannuru N.R.; Nie B.; Shimray S.; Wang Z.	ChatGPT and a new academic reality: Artificial Intelligence-written research papers and the ethics of the large language models in scholarly publishing	2023	Exposed (academia and scholarly research and publishing), Impact on Academic Job Expectations, Tenure, and Promotion, Citation Practices, Authorship, Copyright, and Plagiarism, ownership, compliance with copyright laws	automated preparation of essays and other types of scholarly manuscripts, availability of review reports, dissemination and diffusion of new research ideas, translation, summarization, and question answering		Scholarly Publishing
Sallam M.	ChatGPT Utility in Healthcare Education, Research, and Practice: Systematic Review on the Promising Perspectives and Valid Concerns	2023	ethical, copyright, transparency, and legal issues, the risk of bias, plagiarism, lack of originality, inaccurate content with risk of hallucination, limited knowledge, incorrect citations, cybersecurity issues, and risk of infodemics.	(3) benefits in health care practice (streamlining the workflow, cost saving, documentation, personalized medicine, and improved health literacy); and (4) benefits in health care education including improved personalized learning and the focus on critical thinking and problem-based learning	Improved scientific writing and enhancing research equity and versatility; (2) utility in health care research (efficient analysis of datasets, code generation, literature reviews, saving time to focus on experimental design, and drug discovery and development). The promising applications of ChatGPT can induce paradigm shifts in health care education, research, and practice.	health care education- LR though PRIMSA guidelines	artificial intelligence; digital health; ethics; healthcare; machine learning
Valentín-Bravo F.J.; Mateos-Álvarez E.; Usategui-Martín R.; Andrés-Iglesias C.; Pastor-Jimeno J.C.; Pastor-Idoate S.	Artificial Intelligence and new language models in Ophthalmology: Complications of the use of silicone oil in vitreoretinal surgery; [Integrando la Inteligencia Artificial y los nuevos modelos de lenguaje en Oftalmología: Complicaciones del uso del aceite de silicona en cirugía vítreo-retiniana]	2023	scientific accuracy and reliability on specific topics				Artificial intelligence; ChatGPT; DALL-E; Language models; Silicone oil
Qasem F.	ChatGPT in scientific and academic research: future fears and reassurances	2023	misuse of ChatGPT as a tool to plagiarize and make the researchers dependent, not self-reliant and lazy, less control over research and writing ethics		wisely and ethically at scientific and academic levels	scientific research and academic works and assignments	Academic work; AI language model programs; Artificial intelligence (AI); ChatGPT; Generative Pre-Trained Transformer 3 (GPT-3); Scientific research
Ariyaratne S.; Iyengar K.P.; Nischal N.; Chitti Babu N.; Botchu R.	A comparison of ChatGPT-generated articles with human-written articles	2023	accuracy, factually inaccurate and had fictitious references	generate coherent research articles		Research	Accuracy; Articles; ChatGPT; Research
Lee J.Y.	Can an artificial intelligence chatbot be the author of a scholarly article?	2023	deception, copyrighted	advanced than search engines	cannot take responsibility for their writing	Scientific research	Artificial intelligence; Authorship; Chatbot; Copyright; Research ethics
Salvagno M.; Taccone F.S.; Gerli A.G.	Can artificial intelligence help for scientific writing?	2023	risk of plagiarism and inaccuracies, as well as a potential imbalance in its accessibility between high- and low-income countries	assisting researchers and scientists in organizing material, generating an initial draft and/or in proofreading.	Not a replacement for human judgment, always reviewed by experts before being used in any critical decision-making or application	Scientific writing, critical care medicine	Artificial intelligence; Chatbots; Machine learning; Scientific writing
Yan D.	Impact of ChatGPT on learners in a L2 writing practicum: An exploratory investigation	2023	academic honesty and educational equity	affordance and potential applicability of the tool in L2 writing pedagogy, automatic workflow that could maximize the efficiency in composing writing	reconceptualization of plagiarism in the new era, development of regulatory policies and pedagogical guidance to regulate proper utilization of the tool, establishment of corresponding pedagogical adjustments	L2 learning	AI-enhanced education; Automatic text generation; ChatGPT; Plagiarism; Technology-enhanced writing
Ray P.P.	ChatGPT: A comprehensive review on background, applications, key challenges, bias, ethics, limitations and future scope	2023	ethical concerns, data biases, and safety issues, while discussing potential mitigation strategies	data processing and hypothesis generation to collaboration and public outreach, striking a balance between AI-assisted innovation and human expertise.	integration with other technologies, improved human-AI interaction, and addressing the digital divide	customer service, healthcare, and education	ChatGPT; Context understanding; Conversational AI; Generative AI; GPT-3.5; Language model; Natural language processing
Taecharungroj V.	“What Can ChatGPT Do?” Analyzing Early Reactions to the Innovative AI Chatbot on Twitter	2023	the evolution of jobs, a new technological landscape, the quest for artificial general intelligence, and the progress-ethics conundrum	creative writing, essay writing, prompt writing, code writing, and answering questions		Text analysis of GPT tweets	AI chatbot; artificial intelligence; ChatGPT; LDA; topic modeling; Twitter
Farrokhnia M.; Banihashem S.K.; Noroozi O.; Wals A.	A SWOT analysis of ChatGPT: Implications for educational practice and research	2023	lack of deep understanding, difficulty in evaluating the quality of responses, a risk of bias and discrimination, and a lack of higher-order thinking skills; Threats to education include a lack of understanding of the context, threatening academic integrity, perpetuating discrimination in education, democratising plagiarism, and declining high-order cognitive skills	access to information, facilitate personalised and complex learning, and decrease teaching workload, making key processes and tasks more efficient	generate plausible answers, self-improving capability, and providing personalised and real-time responses	Education	Artificial intelligence; ChatGPT; educational technologies; higher education; SWOT analysis
Grünebaum A.; Chervenak J.; Pollet S.L.; Katz A.; Chervenak F.A.	The exciting potential for ChatGPT in obstetrics and gynecology	2023	Data not apparently updated, inability to cite sources or to truly understand what the user is asking suggests that it has the capability to mislead	valuable for users who want preliminary information about virtually any topic in the field. ;; eloquent, informed, and lacked a significant degree of mistakes or misinformation	Responsible use ensure to help but not harm users seeking information.	Medicine: obstetrics and gynecology	artificial intelligence; cesarean delivery; chatbots; ChatGPT; ethics; gynecology; home birth; informed consent; maternal-fetal medicine; obstetrics; oncology; preeclampsia; prematurity; preterm birth; progesterone; reproductive medicine; short cervix; vaginal progesterone
Su J.; Yang W.	Unlocking the Power of ChatGPT: A Framework for Applying Generative AI in Education	2023	untested effectiveness of the technology, limitations in the quality of data, and ethical and safety concerns	more personalized and efficient learning experience for students as well as easier and faster feedback for teachers		Education	ChatGPT; educative AI; generative AI; GPT-4; IDEE framework
Halaweh M.	ChatGPT in education: Strategies for responsible implementation	2023	Text Generation and ideas generation	Text generation and ideas generation	incorporating ChatGPT into education; provide educators with a set of strategies and techniques to ensure responsible and successful implementation of ChatGPT in teaching or research. Policy for ChatGPT, Reflection note/report, Audit trail of queries, Use AI detector tools, and Swap roles	0	artificial intelligence (AI); ChatGPT; education; educational technologies
Kooli C.	Chatbots in Education and Research: A Critical Examination of Ethical Implications and Solutions	2023	misuse and exploitation	supporting human expertise and judgment	shift research processes and transform educative systems, Digital assessments are going to disappear and assessment methods need to be more creative and innovative. Co-living, sustainability and continuous adaptation to the development of these systems will become a matter of emergency. Raising awareness, adopting appropriate legislations and solidifying ethical values will strengthen research an…	Education and research	artificial intelligence; chatbots; ChatGPT; education; ethics; research; sustainability
Cox C.; Tzoc E.	ChatGPT Implications for academic libraries	2023		generate text in response to questions posed to it. It can generate essays, email, song lyrics, recipes, computer code, webpages, even games and medical diagnoses.		General
Karaali G.	Artificial Intelligence, Basic Skills, and Quantitative Literacy	2023	teaching basic writing and critical thinking skills	write pretty convincing student-level prose, but it is still not very good at answering quantitatively rich questions.	focus on the higher-level skills and habits of mind that make up quantitative literacy (QL) and quantitative reasoning (QR), we should not forget that basic literacy and numeracy are still foundational building blocks.	Quantitative literacy	AI; Artificial intelligence; Large language models; NAEP; Quantitative literacy
Rao D.	The Urgent Need for Healthcare Workforce Upskilling and Ethical Considerations in the Era of AI-Assisted Medicine	2023	ethical and privacy concerns	improve patient outcomes and reduce the workload of healthcare professionals	significant training and upskilling of healthcare providers. accompanied by rigorous guidelines	Healthcare workforce	Covid-19; Data Privacy; Ethical Considerations; Healthcare workforce; India
Cotton D.R.E.; Cotton P.A.; Shipway J.R.	Chatting and cheating: Ensuring academic integrity in the era of ChatGPT	2023	academic honesty and plagiarism; unfair advantage over other students; distinguish between a student’s own writing and ChatGPT.	increased student engagement, collaboration, and accessibility, creation of personalised assessments, reation of interactive, game-based assessments, grade assignments and provide feedback	ensure ethical and responsible use of these tools. developing policies and procedures, providing training and support, and using various methods to detect and prevent cheating. proactive and ethical approach; Educate students on plagiarism, Require students to submit drafts of their work for review before the final submission, Use plagiarism detection tools, Set clear guidelines for use of GPT-3 …	Higher education	detection and prevention; higher education; Machine-generated writing; plagiarism
Carvalho I.; Ivanov S.	ChatGPT for tourism: applications, benefits and risks	2023	significant inaccuracies or lack of content originality, Jobs, cybersecurity risks, creation of fake news, risks of sharing customers’ personal data and other sensitive information	streamline customer service in front-of-house operations and increase productivity and efficiency in back-of-house operations	proactive measures to ensure that students are equipped with the skills to: engage in human–machine hybrid work (van der Aalst, 2021) and critically evaluate the limitations and risks of AI and adapt to a changing labor market where soft skills might become more valued	tourism sector	AI in tourism; Chatbots; ChatGPT; Generative language models; Intelligent automation; LLMs; Tourism
Jungwirth D.; Haluza D.	Artificial Intelligence and Public Health: An Exploratory Study	2023	purely invented by GPT-3 and thus invalid	assemble, summarize, and generate plausible text blocks	good scientific practice also needs to be followed for AI contributions, and a broad scientific discourse on AI contributions is needed	scientific writing	artificial intelligence; automation; chatbots; ChatGPT; collaboration; digital health; GPT-3; human-AI interaction; open science; OpenAI; technological advancement
Pavlik J.V.	Collaborating With ChatGPT: Considering the Implications of Generative Artificial Intelligence for Journalism and Media Education	2023				journalism and media	critical thinking; data journalism; information communication technologies; information processing; journalism; Journalism and Mass Communication Education; knowledge; media; technology; undergraduate education
Geerling W.; Mateer G.D.; Wooten J.; Damodaran N.	ChatGPT has Aced the Test of Understanding in College Economics: Now What?	2023	academic integrity	complete the Test of Understanding in College Economics (TUCE) exam	redesign their curriculum in at least one of the following three ways: reintroduce proctored, in-person assessments; augment learning with chatbots; and/or increase the prevalence of experiential learning projects that artificial intelligence struggles to replicate well	economics, assessment	academic integrity; artificial intelligence; assessment; ChatGPT; TUCE
Masters K.	Ethical use of artificial intelligence in health professions education: AMEE Guide No.158	2023	data gathering, anonymity, privacy, consent, data ownership, security, bias, transparency, responsibility, autonomy, and beneficence.		proactive action; cope with its complexities	health professions and medical education	artificial intelligence; ChatGPT; Ethics; health professions education; medical education
Gilson A.; Safranek C.W.; Huang T.; Socrates V.; Chi L.; Taylor R.A.; Chartash D.	How Does ChatGPT Perform on the United States Medical Licensing Examination? The Implications of Large Language Models for Medical Education and Knowledge Assessment	2023		Medical Licensing Examination	interactive medical education tool to support learning	Medical education	artificial intelligence; chatbot; ChatGPT; conversational agent; education technology; generative pre-trained transformer; GPT; machine learning; medical education; MedQA; natural language processing; NLP
Cascella M.; Montomoli J.; Bellini V.; Bignami E.	Evaluating the Feasibility of ChatGPT in Healthcare: An Analysis of Multiple Clinical and Research Scenarios	2023	Misuse in medicine and research	writing scientific articles and other scientific outputs; support of the clinical practice, scientific production	Reasoning about public health topics.	healthcare	Artificial intelligence; ChatGPT; Clinical resaerch; Medicine
Ivanov S.; Soliman M.	Game of algorithms: ChatGPT implications for the future of tourism education and research	2023		generate text (assignments and research papers)	reevaluate teaching and assessment strategies and incorporate generative language models in teaching. Receptive toward manuscripts that are partially generated by AI	Tourism education and research	ChatGPT; Intelligent automation; Large language models; Tourism education; Tourism research
Rozado D.	The Political Biases of ChatGPT	2023	political biases, misuse		balanced arguments on the issue	Political	AI; algorithmic bias; ChatGPT; large language models; LLMs; OpenAI; political bias
Emenike M.E.; Emenike B.U.	Was This Title Generated by ChatGPT? Considerations for Artificial Intelligence Text-Generation Software Programs for Chemists and Chemistry Educators	2023	academic integrity and student assessment, biases, Equity and accessibility. plagiarism, and accountability for student learning.	teaching, mentoring, research, and professional activities	inevitably have to contend with even more types of applications.	chemistry community	Communication/Writing; Curriculum; First-Year Undergraduate/General; General Public; Graduate Education/Research; Internet/Web-Based Learning; Professional Development; Second-Year Undergraduate; Upper-Division Undergraduate
Thurzo A.; Strunga M.; Urban R.; Surovková J.; Afrashtehfar K.I.	Impact of Artificial Intelligence on Dental Education: A Review and Guide for Curriculum Update	2023	Factual reliability	essay, thesis, or scientific paper writing	guide for curriculum, consensus is needed for the safe and responsible implementation of AI	dental education	AI; AI academic implementation; AI detectors; AI plagiarism; ChatGPT; dentistry; education curriculum; generative AI; health professions; Midjourney
Cooper G.	Examining Science Education in ChatGPT: An Exploratory Study of Generative Artificial Intelligence	2023	ChatGPT runs the risk of positioning itself as the ultimate epistemic authority, where a single truth is assumed without a proper grounding in evidence or presented with sufficient qualifications. its potential environmental impact, issues related to content moderation, and the risk of copyright infringement	research tool for assistance with editing and to experiment with making the research narrative clearer.	model responsible use of ChatGPT, prioritise critical thinking, and be clear about expectations. Educators should critically evaluate any AI-generated resource and adapt it to their specific teaching contexts	education	ChatGPT; Digital technologies; Generative artificial intelligence and science education; Large language models
Short C.E.; Short J.C.	The artificially intelligent entrepreneur: ChatGPT, prompt engineering, and entrepreneurial rhetoric creation	2023	mimic each celebrity	elevator pitches, social media pitches, and crowdfunding pitches	dependent on effective prompt engineering	entrepreneurial rhetoric	Artificial intelligence; ChatGPT; Content analysis; Crowdfunding; Elevator pitch; Prompt engineering
Dwivedi Y.K.; Kshetri N.; Hughes L.; Slade E.L.; Jeyaraj A.; Kar A.K.; Baabdullah A.M.; Koohang A.; Raghavan V.; Ahuja M.; Albanna H.; Albashrawi M.A.; Al-Busaidi A.S.; Balakrishna	“So what if ChatGPT wrote it?” Multidisciplinary perspectives on opportunities, challenges and implications of generative conversational AI for research, practice and policy	2023	disruptions to practices, threats to privacy and security, and consequences of biases, misuse, and misinformation	enhance productivity and suggest that it is likely to offer significant gains in the banking, hospitality and tourism, and information technology industries, and enhance business activities, such as management and marketing.	identifying skills, resources, and capabilities needed to handle generative AI; examining biases of generative AI attributable to training datasets and processes; exploring business and societal contexts best suited for generative AI implementation; determining optimal combinations of human and generative AI for various tasks; identifying ways to assess accuracy of text produced by generative AI;…	Education	ChatGPT; Conversational agent; Generative AI; Generative artificial intelligence; Large language models
Victor B.G.; Kubiak S.; Angell B.; Perron B.E.	Time to Move Beyond the ASWB Licensing Exams: Can Generative Artificial Intelligence Offer a Way Forward for Social Work?	2023	Writing the association of Social Work Boards (ASWB) licensing exams	Writing the association of Social Work Boards (ASWB) licensing exams	support licensure requirements, state regulators and legislators should temporarily suspend the use of the ASWB exams for this purpose	Licensing exams	dynamic testing; generative artificial intelligence; licensing; social work professionals; validity
Yeadon W.; Inyang O.-O.; Mizouri A.; Peach A.; Testrow C.P.	The death of the short-form physics essay in the coming AI revolution	2023	threat to the fidelity of short-form essays as an assessment method	essay writing		Physics education	authentic assessment; ChatGPT; ethics; language models; NLP; pedagogy
Haluza D.; Jungwirth D.	Artificial Intelligence and Ten Societal Megatrends: An Exploratory Study Using GPT-3	2023		digitalization, urbanization, globalization, climate change, automation and mobility, global health issues, and the aging population. emerging markets and Sustainability	Utilize to benefits societal megatrends	societal megatrends	artificial intelligence; automation; chatbots; ChatGPT; collaboration; digital health; global trends; GPT-3; human–AI interaction; OpenAI; technological advancement
Lim W.M.; Gunasekara A.; Pallant J.L.; Pallant J.I.; Pechenkina E.	Generative AI and the future of education: Ragnarök or reformation? A paradoxical perspective from management educators	2023	foe, dependent, restrictive, and banned	friend, capable, accessible, and popular	approaching Generative AI as a game-changer for education reformation; mitigating a situation	management education	Academic integrity; Bard; ChatGPT; Critical analysis; DALL-E; Education; Educator; Ethics; Future of education; Generative AI; Generative artificial intelligence; Google; Management education; Management educator; OpenAI; Paradox; Paradox theory; Ragnarök; Reformation; Transformation; Transformative education
Tlili A.; Shehata B.; Adarkwah M.A.; Bozkurt A.; Hickey D.T.; Huang R.; Agyemang B.	What if the devil is my guardian angel: ChatGPT as a case study of using chatbots in education	2023	cheating, honesty and truthfulness of ChatGPT, privacy misleading, and manipulation	educational transformation, response quality, usefulness, personality and emotion.	safe and responsible adoption of chatbots	education	Artificial intelligence; Chatbots; ChatGPT; Education; Generative AI; Human–machine collaboration

## Sheet: Ethics-Risk
Authors	Private data input, data confidentiality	quality of output	inaccurate, misinformation, nonsense content,	Bias response	cybersecurity	academic integrity and honesty concern	plagiarism	Job Expectations and evolution	Copyright, compliance with copyright laws, consent, legal issues	Citation Practices, incorrect citations	ownership; Authorship; impersonation	infodemics	lack of originality	transparency	Reliability, Factual reliability	self-reliant and lazy	deception, manipulation, mislead, risk of hallucination	digital divide, perpetuating discrimination in education	educational equity	safety issues or security from misuse	lack of deep understanding	declining high-order cognitive skills; higher-order thinking skills	Data not apparently updated; limited knowledge	exploitation	responsibility	autonomy	beneficence.	anonymity	Accountability	mimic people	Fidelity	Emotion
Dowling & Lucey (2023)	y	y
Eggmann et al. (2023)	y		y	y	y
Perkins (2022)						y	y
Lund et al. (2023)							y	y	y	y	y
Sallam (2023)				y	y		y		y	y		y	y	y			y						y
Valentín-Bravo et al. (2023) J.C.; Pastor-Idoate S.			y												y
Qasem (2023)							y									y
Ariyaratne (2023)			y							y
Lee (2023)									y								y
Salvagno (2023)			y				y											y
Yan (2023)						y													y
Ray (2023)				y																y
Taecharungroj (2023)								y
Farrokhnia (2023)		y		y		y	y											y			y	y
Grünebaum (2023)										y							y				y		y
Su (2023)		y																		y
Halaweh (2023)																y						y
Kooli (2023)																				y				y
Karaali (2023)																						y
Rao (2023)	y
Cotton (2023)						y	y											y
Carvalho (2023)	y		y		y			y				y	y				y
Jungwirth (2023)			y							y
Geerling (2023)						y
Masters(2023)	y			y					y		y			y						y					y	y	y	y
Cascella(2023)																				y
Rozado (2023)				y																y
Emenike (2023)				y		y	y											y	y										y
Thurzo (2023)															y
Cooper(2023)									y			y					y
Short (2023)																	y													y
Dwivedi (2023) Balakrishna	y		y	y								y								y
Victor (2023)											y
Yeadon(2023)																															y
Lim (2023)
Tlili (2023)	y					y											y														y	y
	7	3	7	8	3	7	8	3	5	5	3	4	2	2	2	2	7	4	2	7	2	3	2	1	1	1	1	1	1	1	2	1

## Sheet: Reward
Authors	Assist with research, thesis, assignment, and essay	idea generation,	data identification	decision support	text summarization	wrting fluency and efficiency	multilingual communication, or translation	Easy access	creating original	question answering	dissemination and diffusion of new info; access to information	streamlining the workflow	cost saving	documentation	personalized learning	improved literacy	critical thinking and problem-based learning	advanced than search engines	Proofreading and editing	data processing	hypothesis generation	code writing	prompt writing	decrease teaching workload	supporting expertise and judgment	text generation	Provide feedback	increased student engagement	increase productivity and efficiency	Assemble or organise text	Passed exams	Teaching and mentoring	Support professional activities	pitches	Support societal megatrends	Collaboration and freindship	Transformation	usefulness
Dowling M.; Lucey B.	y	y	y
Eggmann F.; Weiger R.; Zitzmann N.U.; Blatz M.B.				y	y	y	y
Perkins M.	y							y	y
Lund B.D.; Wang T.; Mannuru N.R.; Nie B.; Shimray S.; Wang Z.		y			y		y			y	y
Sallam M.												y	y	y	y	y	y
Valentín-Bravo F.J.; Mateos-Álvarez E.; Usategui-Martín R.; Andrés-Iglesias C.; Pastor-Jimeno J.C.; Pastor-Idoate S.
Qasem F.
Ariyaratne S.; Iyengar K.P.; Nischal N.; Chitti Babu N.; Botchu R.	y
Lee J.Y.																		y
Salvagno M.; Taccone F.S.; Gerli A.G.	y					y													y											y
Yan D.						y						y
Ray P.P.	y																			y	y
Taecharungroj V.	y									y							y					y	y
Farrokhnia M.; Banihashem S.K.; Noroozi O.; Wals A.											y	y			y									y
Grünebaum A.; Chervenak J.; Pollet S.L.; Katz A.; Chervenak F.A.											y
Su J.; Yang W.															y									y			y
Halaweh M.		y																								y
Kooli C.																									y
Cox C.; Tzoc E.	y									y												y				y
Karaali G.	y									y
Rao D.												y
Cotton D.R.E.; Cotton P.A.; Shipway J.R.								y							y												y	y								y
Carvalho I.; Ivanov S.												y																	y
Jungwirth D.; Haluza D.					y																					y				y
Pavlik J.V.
Geerling W.; Mateer G.D.; Wooten J.; Damodaran N.																															y
Masters K.
Gilson A.; Safranek C.W.; Huang T.; Socrates V.; Chi L.; Taylor R.A.; Chartash D.																															y
Cascella M.; Montomoli J.; Bellini V.; Bignami E.	y																												y
Ivanov S.; Soliman M.	y																									y
Rozado D.
Emenike M.E.; Emenike B.U.	y																							y					y			y	y
Thurzo A.; Strunga M.; Urban R.; Surovková J.; Afrashtehfar K.I.	y
Cooper G.																			y
Short C.E.; Short J.C.																																		y
Dwivedi Y.K.; Kshetri N.; Hughes L.; Slade E.L.; Jeyaraj A.; Kar A.K.; Baabdullah A.M.; Koohang A.; Raghavan V.; Ahuja M.; Albanna H.; Albashrawi M.A.; Al-Busaidi A.S.; Balakrishna																													y
Victor B.G.; Kubiak S.; Angell B.; Perron B.E.																															y
Yeadon W.; Inyang O.-O.; Mizouri A.; Peach A.; Testrow C.P.	y
Haluza D.; Jungwirth D.																																			y
Lim W.M.; Gunasekara A.; Pallant J.L.; Pallant J.I.; Pechenkina E.								y																												y
Tlili A.; Shehata B.; Adarkwah M.A.; Bozkurt A.; Hickey D.T.; Huang R.; Agyemang B.									y						y																						y	y
	13	3	1	1	3	3	2	3	2	4	3	5	1	1	5	1	2	1	2	1	1	2	1	3	1	4	2	1	4	2	3	1	1	1	1	2	1	1

## Sheet: Resilience
Authors	Year	Expertise input	Appropraite testing framework	Establish acceptable usage in Science	co-creation between humans and AI; improved human-AI interaction	academic integrity policies	improving Automated Writing Evaluations (AWE)	enhancing research equity and versatility	Not a replacement for human judgment	establishment of corresponding pedagogical adjustments	addressing the digital divide	potential mitigation strategies	balance between AI-assisted innovation and human expertise	self-improving capability	Promote responsible usage; solidifying ethical values	Use AI detector tools	Audit trail of queries	transform educative systems	Sustainality	Raising awareness; scientific discourse	focus on the higher-level skills and habits (quantitative literacy (QL) and quantitative reasoning (QR))	rigorous guidelines; developing policies and procedures	significant training and upskilling	Experimental learning framework	reintroduce proctored, in-person assessments	Proactive action
Dowling M.; Lucey B.	2023	y	y
Eggmann F.; Weiger R.; Zitzmann N.U.; Blatz M.B.	2023			y
Perkins M.					y	y	y
Lund B.D.; Wang T.; Mannuru N.R.; Nie B.; Shimray S.; Wang Z.	2023
Sallam M.	2023							y
Valentín-Bravo F.J.; Mateos-Álvarez E.; Usategui-Martín R.; Andrés-Iglesias C.; Pastor-Jimeno J.C.; Pastor-Idoate S.	2023
Qasem F.	2023
Ariyaratne S.; Iyengar K.P.; Nischal N.; Chitti Babu N.; Botchu R.	2023
Lee J.Y.	2023
Salvagno M.; Taccone F.S.; Gerli A.G.	2023	y							y
Yan D.	2023		y	y		y				y
Ray P.P.	2023				y						y	y	y
Taecharungroj V.	2023
Farrokhnia M.; Banihashem S.K.; Noroozi O.; Wals A.	2023													y
Grünebaum A.; Chervenak J.; Pollet S.L.; Katz A.; Chervenak F.A.	2023														y
Su J.; Yang W.	2023
Halaweh M.	2023				y	y									y	y	y
Kooli C.	2023				y					y					y			y	y	y
Cox C.; Tzoc E.	2023
Karaali G.	2023																				y
Rao D.	2023																					y	y
Cotton D.R.E.; Cotton P.A.; Shipway J.R.	2023			y		y						y			y	y				y		y	y
Carvalho I.; Ivanov S.	2023				y																y	y	y
Jungwirth D.; Haluza D.	2023			y		y									y					y
Pavlik J.V.	2023
Geerling W.; Mateer G.D.; Wooten J.; Damodaran N.	2023		y															y			y			y	y
Masters K.	2023																									y
Gilson A.; Safranek C.W.; Huang T.; Socrates V.; Chi L.; Taylor R.A.; Chartash D.	2023
Cascella M.; Montomoli J.; Bellini V.; Bignami E.	2023																				y
Ivanov S.; Soliman M.	2023			y		y				y								y			y	y			y
Rozado D.	2023
Emenike M.E.; Emenike B.U.	2023
Thurzo A.; Strunga M.; Urban R.; Surovková J.; Afrashtehfar K.I.	2023		y												y			y
Cooper G.	2023												y		y						y
Short C.E.; Short J.C.	2023
Dwivedi Y.K.; Kshetri N.; Hughes L.; Slade E.L.; Jeyaraj A.; Kar A.K.; Baabdullah A.M.; Koohang A.; Raghavan V.; Ahuja M.; Albanna H.; Albashrawi M.A.; Al-Busaidi A.S.; Balakrishna	2023				y										y				y				y
Victor B.G.; Kubiak S.; Angell B.; Perron B.E.	2023																				y			y	y
Yeadon W.; Inyang O.-O.; Mizouri A.; Peach A.; Testrow C.P.	2023
Haluza D.; Jungwirth D.	2023																		y
Lim W.M.; Gunasekara A.; Pallant J.L.; Pallant J.I.; Pechenkina E.	2023											y						y
Tlili A.; Shehata B.; Adarkwah M.A.; Bozkurt A.; Hickey D.T.; Huang R.; Agyemang B.	2023														y
		2	4	5	6	6	1	1	1	3	1	3	2	1	9	2	1	5	3	3	7	4	4	2	3	1
